# Supplementary material for: Feasibility of an Individualized mHealth Nutrition (iNutrition) Intervention for Post-Discharged Gastric Cancer Patients Following Gastrectomy: A Randomized Controlled Pilot Trial
Source: MDPI journal article supplement (doi:10.3390/nu15081883), 2023-04-13
Supplement: s1 [file s1]

### Supplementary material 1 Sensitivity analysis of the secondary outcomes

**Table S1. GEE results of the secondary outcomes between the intervention and control groups in the per-protocol analysis.**

| Measures      |    | Intervention group<br>(n=11) | Control group<br>(n=10) | Group effect        | Time effect          | Group-by-time interaction effects |                         |          | Effect size    |
|---------------|----|------------------------------|-------------------------|---------------------|----------------------|-----------------------------------|-------------------------|----------|----------------|
|               |    |                              |                         |                     |                      |                                   |                         |          | T0-T1<br>T1-T2 |
|               |    | Mean (SE)                    | Mean (SE)               | Wald $\chi^2$       | Wald $\chi^2$        | Wald $\chi^2$                     | $\beta$ (95% CI)        | <i>P</i> | d              |
| PG-SGA        | T0 | 6.82 (0.65)                  | 7.90 (0.61)             | 6.07                | 14.30                | 1.45                              |                         |          |                |
|               | T1 | 7.91 (0.80)                  | 9.90 (0.64)             | ( <i>P</i> =0.014*) | ( <i>P</i> =0.001*)  | ( <i>P</i> =0.484)                | -0.91 (-3.76, 1.95)     | 0.533    | -0.28          |
|               | T2 | 5.36 (0.92)                  | 8.00 (0.92)             |                     |                      |                                   | -1.56 (-4.11, 1.01)     | 0.234    | -0.55          |
| NRS2002       | T0 | 5.09 (0.09)                  | 4.90 (0.10)             | 0.17                | 92.97                | 2.65                              |                         |          |                |
|               | T1 | 3.36 (0.32)                  | 3.40 (0.29)             | ( <i>P</i> =0.677)  | ( <i>P</i> < 0.001*) | ( <i>P</i> =0.266)                | -0.23 (-1.12, 0.66)     | 0.616    | -0.23          |
|               | T2 | 2.73 (0.34)                  | 3.20 (0.24)             |                     |                      |                                   | -0.66 (-1.51, 0.18)     | 0.123    | -0.70          |
| Weight        | T0 | 60.61 (3.17)                 | 66.02 (2.84)            | 0.96                | 102.66               | 6.53                              |                         |          |                |
|               | T1 | 56.71 (2.61)                 | 60.74 (2.72)            | ( <i>P</i> =0.328)  | ( <i>P</i> < 0.001*) | ( <i>P</i> =0.038*)               | 1.38 (-0.98, 3.74)      | 0.252    | 0.51           |
|               | T2 | 55.52 (2.60)                 | 57.60 (2.95)            |                     |                      |                                   | 3.33 (0.69, 5.97)       | 0.013*   | 1.10           |
| BMI           | T0 | 22.07 (0.98)                 | 24.34 (0.91)            | 2.32                | 65.26                | 8.23                              |                         |          |                |
|               | T1 | 20.73 (0.82)                 | 22.93 (0.81)            | ( <i>P</i> =0.127)  | ( <i>P</i> < 0.001*) | ( <i>P</i> =0.016*)               | 0.07 (-1.14, 1.28)      | 0.910    | 0.05           |
|               | T2 | 20.30 (0.83)                 | 20.97 (0.61)            |                     |                      |                                   | 1.61 (0.36, 2.85)       | 0.012*   | 1.16           |
| Energy intake | T0 | 185.62 (18.97)               | 243.61 (33.02)          | 3.90                | 187.45               | 10.33                             |                         |          |                |
|               | T1 | 1002.04 (125.83)             | 753.60 (65.96)          | ( <i>P</i> =0.048*) | ( <i>P</i> < 0.001*) | ( <i>P</i> =0.006*)               | 306.44 (35.15, 577.73)  | 0.027*   | 0.99           |
|               | T2 | 1090.40 (92.99)              | 803.66 (64.90)          |                     |                      |                                   | 344.74 (131.59, 557.88) | 0.002*   | 1.44           |

|                                     |    |              |              |                      |                      |                     |                      |          |       |
|-------------------------------------|----|--------------|--------------|----------------------|----------------------|---------------------|----------------------|----------|-------|
| Protein intake                      | T0 | 5.08 (0.69)  | 8.28 (1.76)  | 1.24                 | 109.83               | 7.38                |                      |          |       |
|                                     | T1 | 46.48 (8.03) | 41.10 (7.15) | ( <i>P</i> =0.265)   | ( <i>P</i> < 0.001*) | ( <i>P</i> =0.025*) | 8.58 (-12.68, 29.83) | 0.429    | 0.36  |
|                                     | T2 | 55.52 (6.67) | 39.04 (3.72) |                      |                      |                     | 19.68 (4.47, 34.88)  | 0.011*   | 1.14  |
| Compliance with energy requirement  | T0 | 0.12 (0.01)  | 0.15 (0.02)  | 4.88                 | 280.13               | 14.48               |                      |          |       |
|                                     | T1 | 0.67 (0.08)  | 0.51 (0.05)  | ( <i>P</i> =0.027*)  | ( <i>P</i> < 0.001*) | ( <i>P</i> =0.001*) | 0.19 (0.02, 0.37)    | 0.030    | 1.00  |
|                                     | T2 | 0.74 (0.06)  | 0.54 (0.04)  |                      |                      |                     | 0.23 (0.11, 0.35)    | < 0.001* | 1.63  |
| Compliance with protein requirement | T0 | 0.07 (0.01)  | 0.11 (0.02)  | 2.29                 | 151.55               | 13.78               |                      |          |       |
|                                     | T1 | 0.64 (0.09)  | 0.58 (0.11)  | ( <i>P</i> =0.130)   | ( <i>P</i> < 0.001*) | ( <i>P</i> =0.001*) | 0.10 (-0.18, 0.38,)  | 0.493    | 0.31  |
|                                     | T2 | 0.84 (0.09)  | 0.54 (0.04)  |                      |                      |                     | 0.34 (0.15, 0.54)    | < 0.001* | 1.53  |
| HAPA Scale                          | T0 | 3.76 (0.12)  | 3.55 (0.09)  | 34.81                | 3.67                 | 10.04               |                      |          |       |
|                                     | T1 | 3.91 (0.08)  | 2.98 (0.14)  | ( <i>P</i> < 0.001*) | ( <i>P</i> =0.160)   | ( <i>P</i> =0.007*) | 0.72 (0.28, 1.17)    | 0.002*   | 0.68  |
|                                     | T2 | 3.94 (0.13)  | 3.04 (0.15)  |                      |                      |                     | 0.69 (0.16, 1.22)    | 0.011*   | 1.18  |
| GSRS                                | T0 | 7.00 (0.99)  | 6.70 (0.98)  | 2.00                 | 2.92                 | 4.03                |                      |          |       |
|                                     | T1 | 6.64 (1.56)  | 10.00 (1.30) | ( <i>P</i> =0.158)   | ( <i>P</i> =0.232)   | ( <i>P</i> =0.133)  | -3.66 (-8.15, 0.82)  | 0.109    | -0.74 |
|                                     | T2 | 6.82 (1.50)  | 9.70 (1.48)  |                      |                      |                     | -3.18 (-6.76, 0.39)  | 0.081    | -0.79 |
| QLQ-C30                             | T0 | 80.48 (3.89) | 71.09 (3.95) | 4.95                 | 4.18                 | 0.54                |                      |          |       |
|                                     | T1 | 77.26 (4.11) | 65.11 (3.71) | ( <i>P</i> =0.052)   | ( <i>P</i> =0.124)   | ( <i>P</i> =0.764)  | 2.76 (-7.91, 13.43)  | 0.612    | 0.23  |
|                                     | T2 | 75.66 (3.77) | 67.05 (3.30) |                      |                      |                     | -0.78 (-9.98, 8.41)  | 0.868    | 0.07  |

Notes. GEE = Generalized estimating equations, T0 = baseline; T1 = middle of the intervention; T2 = immediately after the intervention; PG-SGA = Patient-Generated Subjective Global Assessment; NRS2002 = Nutritional risk screening 2002; HAPA Scale= Health Action Process Approach Theory Scale; GSRS = Gastrointestinal Symptom Rating Scale; QLQ-C30 = European Organization for the Research and Treatment of Cancer Quality of Life Questionnaire.

**Table S2. GEE results of the comparison between ITT and per-protocol analyses**

| Outcome Measure                     | GEE Analysis | ITT Analysis  |          | Per protocol analysis |          |
|-------------------------------------|--------------|---------------|----------|-----------------------|----------|
|                                     |              | Wald $\chi^2$ | p-value  | Wald $\chi^2$         | p-value  |
| PG-SGA                              | Group effect | 3.25          | 0.072    | 6.07                  | 0.014*   |
|                                     | Time effect  | 13.18         | < 0.001* | 14.30                 | 0.001*   |
|                                     | Group x time | 0.99          | 0.609    | 1.45                  | 0.484    |
| NRS2002                             | Group effect | 0.84          | 0.361    | 0.17                  | 0.677    |
|                                     | Time effect  | 60.42         | < 0.001* | 92.97                 | < 0.001* |
|                                     | Group x time | 2.39          | 0.303    | 2.65                  | 0.266    |
| Weight                              | Group effect | 2.17          | 0.141    | 0.96                  | 0.328    |
|                                     | Time effect  | 82.75         | < 0.001* | 102.66                | < 0.001* |
|                                     | Group x time | 3.33          | 0.189    | 6.53                  | 0.038*   |
| BMI                                 | Group effect | 3.36          | 0.067    | 2.32                  | 0.127    |
|                                     | Time effect  | 58.46         | < 0.001* | 65.26                 | < 0.001* |
|                                     | Group x time | 5.31          | 0.070    | 8.23                  | 0.016*   |
| Energy intake                       | Group effect | 4.37          | 0.037*   | 3.90                  | 0.048*   |
|                                     | Time effect  | 162.64        | < 0.001* | 187.45                | < 0.001* |
|                                     | Group x time | 6.54          | 0.038*   | 10.33                 | 0.006*   |
| Protein intake                      | Group effect | 1.75          | 0.185    | 1.24                  | 0.265    |
|                                     | Time effect  | 96.41         | < 0.001* | 109.83                | < 0.001* |
|                                     | Group x time | 4.85          | 0.088    | 7.38                  | 0.025*   |
| Compliance with energy requirement  | Group effect | 7.08          | 0.008*   | 4.88                  | 0.027*   |
|                                     | Time effect  | 231.87        | < 0.001* | 280.13                | < 0.001* |
|                                     | Group x time | 10.28         | 0.006*   | 14.48                 | 0.001*   |
| Compliance with protein requirement | Group effect | 3.74          | 0.053    | 2.29                  | 0.130    |
|                                     | Time effect  | 122.88        | < 0.001* | 151.55                | < 0.001* |
|                                     | Group x time | 9.57          | 0.008*   | 13.78                 | 0.001*   |
| HAPA                                | Group effect | 41.72         | < 0.001* | 34.81                 | < 0.001* |
|                                     | Time effect  | 2.37          | 0.306    | 3.67                  | 0.160    |
|                                     | Group x time | 10.52         | 0.005*   | 10.04                 | 0.007*   |
| GSRS                                | Group effect | 2.21          | 0.137    | 2.00                  | 0.158    |
|                                     | Time effect  | 0.71          | 0.700    | 2.92                  | 0.232    |
|                                     | Group x time | 1.02          | 0.601    | 4.03                  | 0.133    |
| QoL                                 | Group effect | 3.49          | 0.062    | 4.95                  | 0.056    |
|                                     | Time effect  | 2.47          | 0.292    | 4.18                  | 0.124    |
|                                     | Group x time | 0.73          | 0.695    | 0.54                  | 0.764    |

Notes. GEE = Generalized estimating equations; ITT = Intention-to-treat; PG-SGA = Patient-Generated Subjective Global Assessment; NRS2002 = Nutritional risk screening 2002; HAPA Scale= Health Action Process Approach Theory Scale; GSRS = Gastrointestinal Symptom Rating Scale; QLQ-C30 = European Organization for the Research and Treatment of Cancer Quality of Life Questionnaire. \* $p < 0.05$
